# Supplementary material
Source: PubMed Central journal article supplement (PMC4477288)

Supplementary Table 1. Multivariable Cox model for D30 total cell chimerism

|                                                            | OS   |        |         |        | PFS  |        |         |        | NRM  |        |         |       | Relapse |        |         |        |
|------------------------------------------------------------|------|--------|---------|--------|------|--------|---------|--------|------|--------|---------|-------|---------|--------|---------|--------|
|                                                            | HR   | 95% CI | p-value |        | HR   | 95% CI | p-value |        | HR   | 95% CI | p-value |       | HR      | 95% CI | p-value |        |
| Age ≥65 vs <65 years                                       | 1.36 | 1.03   | 1.80    | 0.03   | 1.17 | 0.90   | 1.53    | 0.24   | 1.19 | 0.67   | 2.10    | 0.55  | 1.06    | 0.77   | 1.45    | 0.74   |
| Patient-Donor Sex Match<br>F->M vs. Other                  | 1.04 | 0.82   | 1.32    | 0.76   | 0.91 | 0.73   | 1.14    | 0.43   | 1.10 | 0.68   | 1.77    | 0.7   | 0.94    | 0.73   | 1.23    | 0.67   |
| Disease Risk Index                                         |      |        |         |        |      |        |         |        |      |        |         |       |         |        |         |        |
| Intermediate vs. Low                                       | 1.76 | 1.30   | 2.39    | 0.0003 | 2.11 | 1.59   | 2.78    | <.0001 | 0.76 | 0.46   | 1.24    | 0.27  | 2.63    | 1.88   | 3.68    | <.0001 |
| High/Very high vs. Low                                     | 2.98 | 2.11   | 4.21    | <.0001 | 3.39 | 2.46   | 4.68    | <.0001 | 0.75 | 0.40   | 1.40    | 0.36  | 3.90    | 2.66   | 5.72    | <.0001 |
| HLA type                                                   |      |        |         |        |      |        |         |        |      |        |         |       |         |        |         |        |
| MUD vs. MRD                                                | 1.11 | 0.88   | 1.40    | 0.40   | 0.89 | 0.72   | 1.10    | 0.29   | 1.36 | 0.85   | 2.18    | 0.2   | 0.84    | 0.66   | 1.06    | 0.14   |
| Mismatched vs. MRD                                         | 1.03 | 0.64   | 1.65    | 0.90   | 0.77 | 0.50   | 1.19    | 0.23   | 1.63 | 0.69   | 3.90    | 0.27  | 0.59    | 0.34   | 1.02    | 0.06   |
| Diagnosis:                                                 |      |        |         |        |      |        |         |        |      |        |         |       |         |        |         |        |
| Myeloid vs. Lymphoid                                       | 1.18 | 0.94   | 1.49    | 0.16   | 0.96 | 0.77   | 1.19    | 0.71   | 1.16 | 0.74   | 1.81    | 0.52  | 0.92    | 0.72   | 1.18    | 0.51   |
| ABO type: match vs. mismatch                               | 1.16 | 0.95   | 1.43    | 0.15   | 1.10 | 0.91   | 1.33    | 0.33   | 1.29 | 0.85   | 1.95    | 0.23  | 1.02    | 0.82   | 1.27    | 0.84   |
| Prior allo HSCT: Yes vs. No                                | 0.94 | 0.70   | 1.28    | 0.71   | 1.07 | 0.82   | 1.39    | 0.64   | 0.92 | 0.49   | 1.70    | 0.78  | 1.08    | 0.81   | 1.45    | 0.59   |
| Busulfan dose: Bu2 vs. Bu1                                 | 0.92 | 0.68   | 1.24    | 0.56   | 0.88 | 0.67   | 1.17    | 0.38   | 0.97 | 0.53   | 1.76    | 0.91  | 0.83    | 0.60   | 1.16    | 0.27   |
| WBC risk score*                                            |      |        |         |        |      |        |         |        |      |        |         |       |         |        |         |        |
| 1 vs. 0                                                    | 1.95 | 1.47   | 2.59    | <.0001 | 1.64 | 1.26   | 2.14    | 0.0002 | 1.71 | 1.00   | 2.95    | 0.05  | 1.21    | 0.88   | 1.67    | 0.23   |
| 2 vs. 0                                                    | 3.56 | 2.68   | 4.73    | <.0001 | 2.86 | 2.18   | 3.76    | <.0001 | 1.34 | 0.70   | 2.56    | 0.37  | 2.30    | 1.64   | 3.22    | <.0001 |
| ALC at 1 month (x10 <sup>9</sup> cells/L)<br><0.2 vs. ≥0.2 | 1.15 | 0.80   | 1.63    | 0.46   | 1.36 | 0.98   | 1.88    | 0.07   | 0.80 | 0.38   | 1.68    | 0.55  | 1.49    | 1.02   | 2.18    | 0.04   |
| Patient Donor CMV serostatus<br>any positive vs. negative  | 1.02 | 0.82   | 1.27    | 0.85   | 0.98 | 0.80   | 1.20    | 0.86   | 1.14 | 0.74   | 1.77    | 0.55  | 0.95    | 0.75   | 1.19    | 0.63   |
| GVHD prophylaxis<br>Sirolimus-use vs. not                  | 1.00 | 0.79   | 1.25    | 0.97   | 0.96 | 0.77   | 1.19    | 0.70   | 0.78 | 0.49   | 1.24    | 0.3   | 1.05    | 0.81   | 1.36    | 0.69   |
| Year of HSCT:<br><2004 vs. ≥2004                           | 1.19 | 0.90   | 1.58    | 0.23   | 1.10 | 0.85   | 1.44    | 0.47   | 0.57 | 0.33   | 0.99    | 0.047 | 1.08    | 0.79   | 1.47    | 0.64   |
| D30 Total Donor Cell Chimerism<br><90 vs. ≥90              | 1.08 | 0.86   | 1.36    | 0.50   | 1.41 | 1.14   | 1.74    | 0.0013 | 0.58 | 0.35   | 0.95    | 0.032 | 1.66    | 1.30   | 2.11    | <.0001 |

Supplementary Table 2: Multivariable Cox model for D100 total cell chimerism

|                                           | OS   |        |         |        | PFS  |        |         |        | NRM  |        |         |       | Relapse |        |         |        |
|-------------------------------------------|------|--------|---------|--------|------|--------|---------|--------|------|--------|---------|-------|---------|--------|---------|--------|
|                                           | HR   | 95% CI | p-value |        | HR   | 95% CI | p-value |        | HR   | 95% CI | p-value |       | HR      | 95% CI | p-value |        |
| Age ≥65 vs. <65 years                     | 1.50 | 1.05   | 2.14    | 0.03   | 1.22 | 0.87   | 1.70    | 0.24   | 1.29 | 0.70   | 2.38    | 0.41  | 1.06    | 0.69   | 1.62    | 0.79   |
| Patient-Donor Sex Match<br>F->M vs. Other | 1.08 | 0.80   | 1.46    | 0.62   | 0.93 | 0.70   | 1.23    | 0.60   | 1.05 | 0.63   | 1.75    | 0.85  | 0.94    | 0.68   | 1.31    | 0.72   |
| Disease Risk Index                        |      |        |         |        |      |        |         |        |      |        |         |       |         |        |         |        |
| Intermediate vs. Low                      | 1.70 | 1.18   | 2.43    | 0.004  | 1.92 | 1.39   | 2.65    | <.0001 | 0.89 | 0.53   | 1.52    | 0.68  | 2.52    | 1.69   | 3.78    | <.0001 |
| High/Very high vs. Low                    | 2.71 | 1.77   | 4.15    | <.0001 | 3.14 | 2.12   | 4.67    | <.0001 | 1.22 | 0.63   | 2.35    | 0.56  | 3.66    | 2.25   | 5.96    | <.0001 |
| HLA type                                  |      |        |         |        |      |        |         |        |      |        |         |       |         |        |         |        |
| MUD vs. MRD                               | 1.25 | 0.93   | 1.69    | 0.14   | 1.11 | 0.85   | 1.45    | 0.44   | 1.27 | 0.76   | 2.12    | 0.35  | 1.04    | 0.75   | 1.43    | 0.82   |
| Mismatched vs. MRD                        | 1.04 | 0.58   | 1.88    | 0.90   | 0.85 | 0.49   | 1.46    | 0.55   | 1.38 | 0.54   | 3.47    | 0.5   | 0.62    | 0.30   | 1.27    | 0.19   |
| Diagnosis:                                |      |        |         |        |      |        |         |        |      |        |         |       |         |        |         |        |
| Myeloid vs. Lymphoid                      | 0.99 | 0.74   | 1.31    | 0.93   | 0.83 | 0.64   | 1.08    | 0.16   | 1.10 | 0.68   | 1.78    | 0.71  | 0.76    | 0.55   | 1.05    | 0.10   |
| ABO type: match vs. mismatch              | 1.20 | 0.92   | 1.55    | 0.18   | 1.06 | 0.84   | 1.34    | 0.65   | 1.27 | 0.83   | 1.94    | 0.27  | 0.95    | 0.71   | 1.27    | 0.74   |
| Prior allo HSCT: Yes vs. No               | 0.88 | 0.60   | 1.29    | 0.50   | 1.14 | 0.83   | 1.58    | 0.42   | 0.86 | 0.45   | 1.64    | 0.64  | 1.21    | 0.81   | 1.79    | 0.35   |
| Busulfan dose: Bu2 vs. Bu1                | 0.85 | 0.58   | 1.24    | 0.40   | 0.83 | 0.59   | 1.17    | 0.29   | 0.75 | 0.39   | 1.46    | 0.4   | 0.88    | 0.58   | 1.35    | 0.57   |
| WBC risk score*                           |      |        |         |        |      |        |         |        |      |        |         |       |         |        |         |        |
| 1 vs. 0                                   | 1.89 | 1.32   | 2.71    | 0.0005 | 1.48 | 1.07   | 2.06    | 0.019  | 2.16 | 1.20   | 3.88    | 0.009 | 0.91    | 0.58   | 1.40    | 0.66   |
| 2 vs. 0                                   | 2.88 | 1.56   | 5.31    | 0.0007 | 2.39 | 1.34   | 4.24    | 0.003  | 1.07 | 0.28   | 4.07    | 0.92  | 2.68    | 1.42   | 5.04    | 0.002  |
| ALC at 3 month (x10 <sup>9</sup> cells/L) |      |        |         |        |      |        |         |        |      |        |         |       |         |        |         |        |
| <0.2 vs. ≥0.2                             | 1.89 | 1.13   | 3.18    | 0.02   | 1.51 | 0.92   | 2.48    | 0.10   | 2.19 | 1.01   | 4.76    | 0.05  | 0.94    | 0.48   | 1.84    | 0.87   |
| Unknown vs. ≥0.2                          | 0.62 | 0.29   | 1.33    | 0.22   | 0.64 | 0.31   | 1.33    | 0.23   | 1.49 | 0.33   | 6.80    | 0.61  | 0.42    | 0.18   | 0.99    | 0.05   |
| Patient Donor CMV serostatus              |      |        |         |        |      |        |         |        |      |        |         |       |         |        |         |        |
| any positive vs. negative                 | 1.01 | 0.77   | 1.32    | 0.95   | 0.98 | 0.76   | 1.26    | 0.87   | 1.15 | 0.72   | 1.82    | 0.56  | 0.94    | 0.69   | 1.28    | 0.70   |
| GVHD prophylaxis                          |      |        |         |        |      |        |         |        |      |        |         |       |         |        |         |        |
| Sirolimus-use vs. not                     | 0.88 | 0.66   | 1.18    | 0.39   | 0.86 | 0.66   | 1.12    | 0.27   | 0.77 | 0.48   | 1.23    | 0.28  | 0.97    | 0.69   | 1.36    | 0.86   |
| Year of RIC HSCT:                         |      |        |         |        |      |        |         |        |      |        |         |       |         |        |         |        |
| <2004 vs. ≥2004                           | 1.15 | 0.80   | 1.64    | 0.45   | 1.16 | 0.83   | 1.60    | 0.39   | 0.63 | 0.35   | 1.14    | 0.13  | 1.03    | 0.69   | 1.53    | 0.90   |
| D100 Total Donor Cell<br>Chimerism        |      |        |         |        |      |        |         |        |      |        |         |       |         |        |         |        |
| <90 vs. ≥90                               | 1.50 | 1.11   | 2.04    | 0.009  | 2.01 | 1.53   | 2.65    | <.0001 | 0.76 | 0.44   | 2.27    | 0.33  | 2.54    | 1.83   | 3.51    | <.0001 |

\*: ref. 15, 0 if WBC at 1 and 3 months of HSCT were both 2-10x10<sup>9</sup> cells/L or >10x10<sup>9</sup> cells/L at 1month but 2-10x10<sup>9</sup> cells/L at 3 months of HSCT; 1 if WBC <2x10<sup>9</sup> cells/L at 1 or 3 months of HSCT; 2 if WBC >10x10<sup>9</sup> cells/L at 1 or 3 months of HSCT.

Supplementary Figure 1A

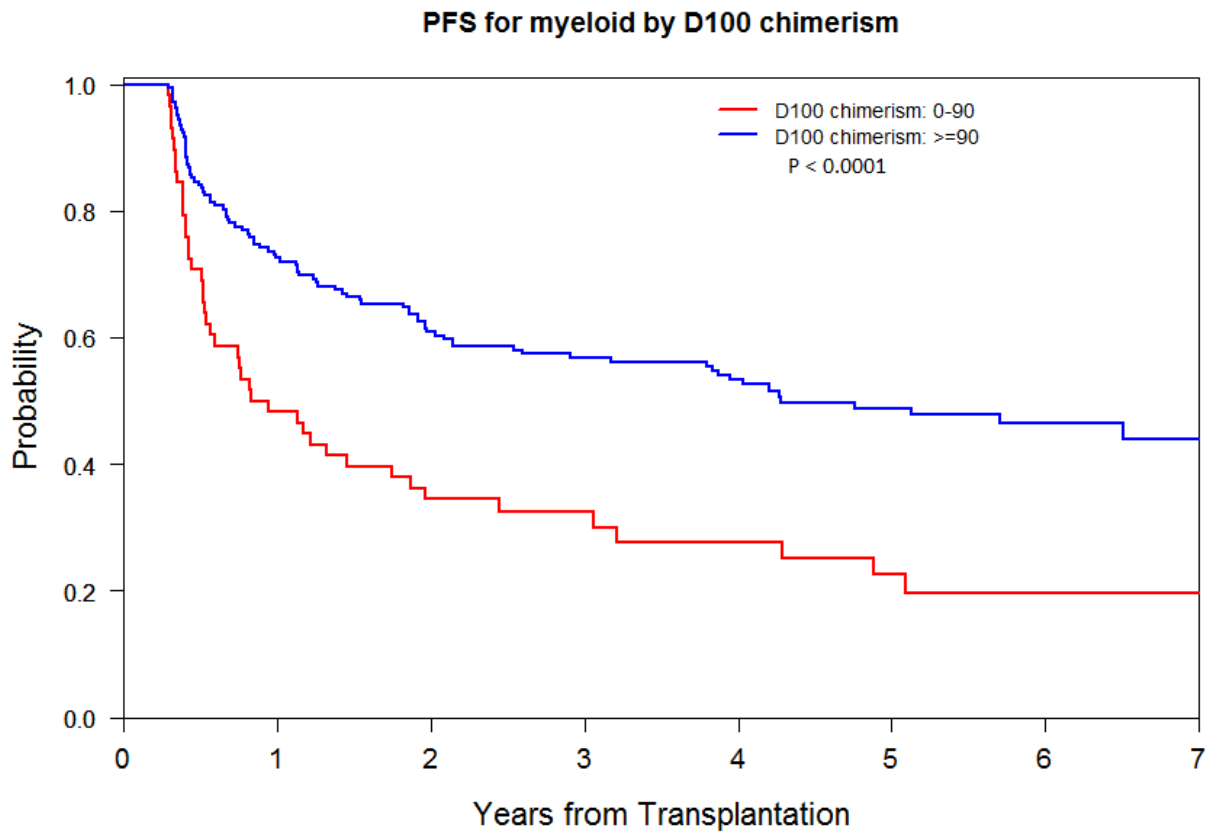

Supplementary Figure 1B

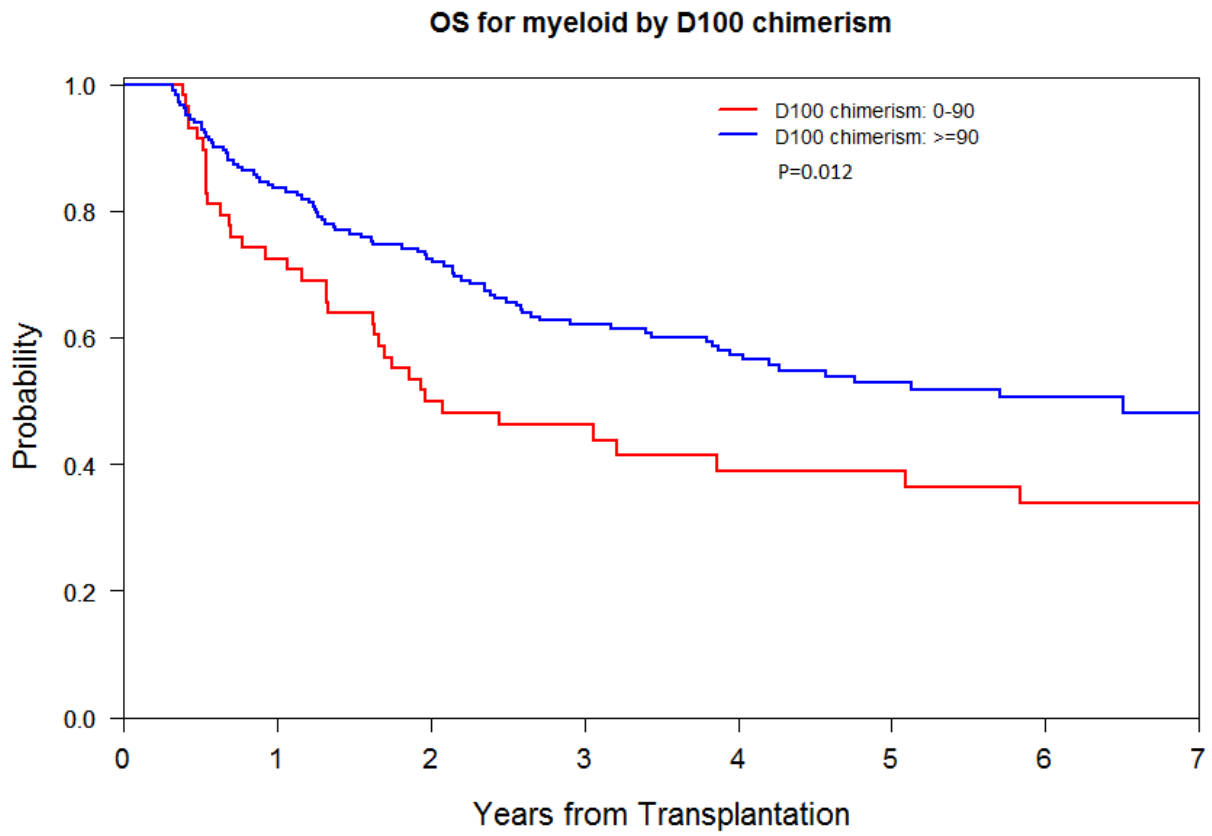

Supplementary Figure 1C

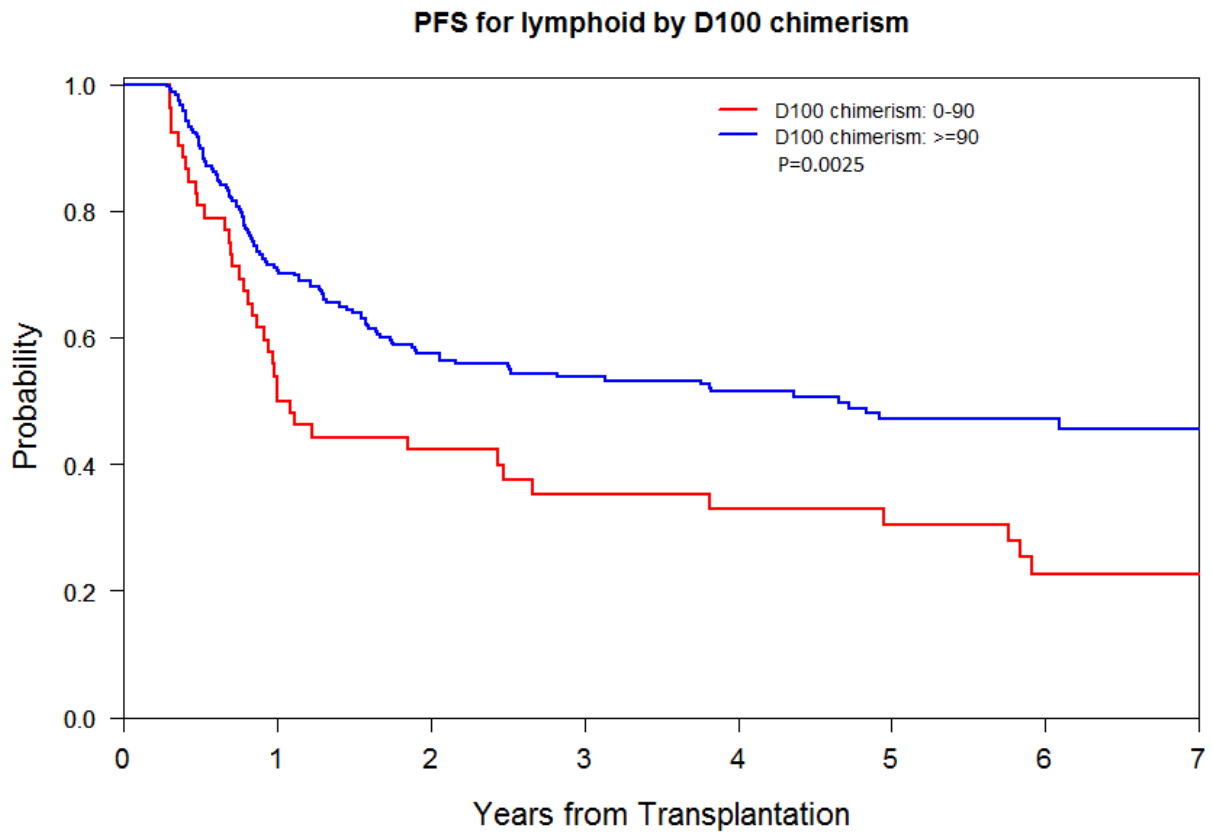

Supplementary Figure 1D

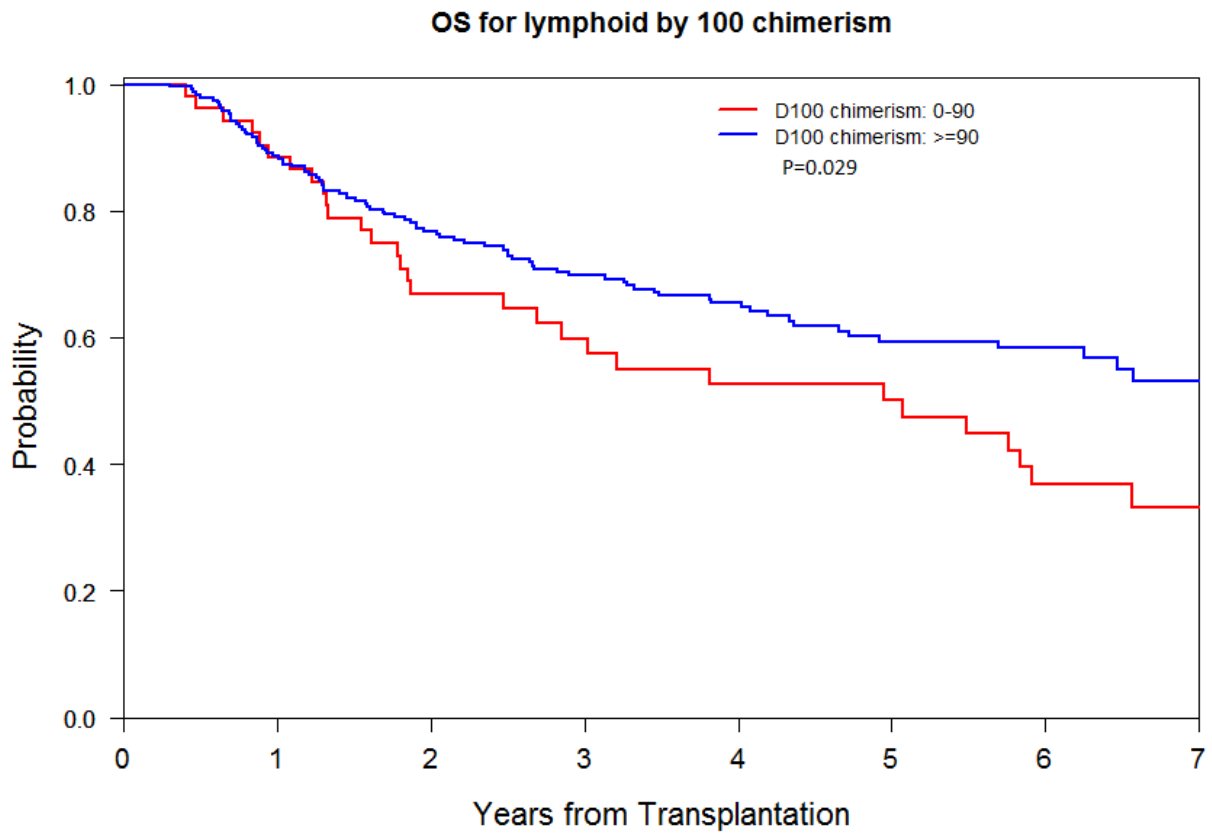

Supplement: NIHMS615750-supplement-01.pdf [file NIHMS615750-supplement-01.pdf]
